# Supplementary material for: Impact of Blood Collection Tubes and Sample Handling Time on Serum and Plasma Metabolome and Lipidome
Source: MDPI journal article supplement (doi:10.3390/metabo8040088), 2018-12-04
Supplement: s1 [file s1]

**Supplemental Document S4. Unique to SST.** The compounds that were only present in SST from Figure 1 C and D and that were database annotated are listed alphabetically.

| Compound                                       | Notes                                                       | RT (mins) | Formula               | CAS         | KEGG   | HMDB      | Lipid Maps   |
|------------------------------------------------|-------------------------------------------------------------|-----------|-----------------------|-------------|--------|-----------|--------------|
| (24S)-7 $\alpha$ ,24-Dihydroxycholesterol      | Bile acids                                                  | 1.899     | C27 H46 O3            |             | C15518 | HMDB60136 |              |
| (6S)-Hydroxyhyoscyamine                        | Alkaloids                                                   | 0.628     | C17 H23 N O4          |             | C03325 |           |              |
| 12-Tricosanol                                  | Fatty alcohols                                              | 2.731     | C23 H48 O             | 24897-74-3  |        | HMDB34285 |              |
| 17-Tetracosenal                                | Fatty aldehydes                                             | 9.308     | C24 H46 O             |             |        |           | LMFA06000105 |
| 20-O-Methyl-19-chloroproansamitocin            | Antibiotic                                                  | 0.698     | C26 H34 Cl N O6       |             | C20135 |           |              |
| 2-Hydroxylauroylcarnitine                      | Acyl carnitines                                             | 4.417     | C19 H37 N O5          |             |        | HMDB13164 |              |
| 3-trans-p-Coumaroylrotundic acid               | Prenol lipids (triterpenoids)                               | 1.623     | C39 H54 O7            | 144624-03-3 |        | HMDB40667 |              |
| 5-Butyltetrahydro-2-oxo-3-furancarboxylic acid | Lactones                                                    | 10.253    | C9 H14 O4             |             |        | HMDB30992 |              |
| 5-Geranyloxy-7-methoxycoumarin                 | Prenol lipids (terpene lactones)                            | 10.268    | C20 H24 O4            | 7380-39-4   |        | HMDB32954 |              |
| 6-Carboxyhexanoyl-CoA                          | Biotin metabolism/benzoate degradation/microbial metabolism | 1.194     | C28 H46 N7 O19 P3 S   |             | C01063 |           |              |
| 6-O-Demethylnigerone                           | Naphthopyrans                                               | 0.679     | C31 H24 O10           | 76045-68-6  |        | HMDB33497 |              |
| Acebutolol                                     | Beta blocking agents                                        | 0.647     | C18 H28 N2 O4         | 37517-30-9  | C06803 |           |              |
| Adenosylcobalamin                              | Tetrapyrroles                                               | 1.778     | C72 H100 Co N18 O17 P | 13870-90-1  | C00194 | HMDB02086 |              |
| Anatalline                                     | Pyridines/Piperidines                                       | 1.284     | C15 H17 N3            |             | C12454 |           |              |
| Arachidonyl Trifluoromethyl Ketone             | Ketones                                                     | 9.380     | C21 H31 F3 O          | 149301-79-1 | C01397 |           |              |
| Arg Lys Tyr                                    | Tripeptides                                                 | 2.940     | C21 H35 N7 O5         |             |        |           |              |
| Assamsaponin J                                 | Terpene glycosides                                          | 1.218     | C66 H96 O27           | 316157-19-4 |        | HMDB36486 |              |
| Balhimycin                                     | Glycopeptide antibiotic                                     | 1.812     | C66 H73 Cl2 N9 O24    |             | C15711 |           |              |
| Calpeptin                                      | Amino acid amides                                           | 2.938     | C20 H30 N2 O4         | 117591-20-5 | C11256 |           |              |
| CL(70:5)                                       | Cardiolipins                                                | 2.188     | C79 H144 O17 P2       |             | C05980 | HMDB10240 |              |
| Crustecdysone                                  | Dihydroxy bile acids                                        | 10.965    | C27 H44 O7            | 5289-74-7   | C02633 | HMDB30180 |              |
| Cyclopasifloside III                           | Terpene glycosides                                          | 9.770     | C43 H72 O16           | 292167-40-9 |        | HMDB38390 |              |
| Cyclopasifloside X                             | Terpene glycosides                                          | 2.169     | C37 H62 O12           | 301540-82-9 |        | HMDB36365 |              |
| D-Fructose                                     | Carbohydrates                                               | 10.571    | C6 H12 O6             | 57-48-7     | C10906 | HMDB00660 |              |
| Ethiprole                                      | Pesticide                                                   | 1.225     | C13 H9 Cl2 F3 N4 O S  | 181587-01-9 | C18552 |           |              |
| GalNAc $\beta$ 1-4GlcNAc $\beta$ -Sp           | Carbohydrates (Oligosaccharides)                            | 0.921     | C18 H31 N5 O11        |             |        |           |              |
| Ganoderic acid K                               | Triterpenoids                                               | 2.123     | C32 H46 O9            | 104700-95-0 |        | HMDB35986 |              |
| Geranyl benzoate                               | Monoterpenoids                                              | 0.432     | C17 H22 O2            | 94-48-4     |        | HMDB33478 |              |
| Glu Cys Cys                                    | Tripeptides                                                 | 0.356     | C11 H19 N3 O6 S2      |             |        |           |              |
| Hodgkinsine                                    | Indole alkaloids                                            | 9.130     | C33 H38 N6            |             | C09211 |           |              |
| Icariin                                        | Flavonoids                                                  | 0.960     | C33 H40 O15           |             | C17555 |           |              |

|                                                       |                                  |        |                     |             |        |           |              |
|-------------------------------------------------------|----------------------------------|--------|---------------------|-------------|--------|-----------|--------------|
| Inosine                                               | Purine nucleosides               | 10.844 | C10 H12 N4 O5       | 58-63-9     | C00294 | HMDB00195 |              |
| Isopentenyl adenosine                                 | Nucleosides (phytohormone; drug) | 2.306  | C15 H21 N5 O4       |             | C16427 |           |              |
| Leucomycin A1                                         | Macrolides (Antibiotics)         | 2.199  | C40 H67 N O14       | 16846-34-7  | C14056 |           |              |
| Leupeptin                                             | Peptides                         | 10.964 | C20 H38 N6 O4       | 55123-66-5  | C01591 |           |              |
| Linoleyl carnitine                                    | Acyl carnitines                  | 2.185  | C25 H45 N O4        | 36816-10-1  |        | HMDB06469 |              |
| Lyciumoside IV                                        | Terpene glycosides               | 0.713  | C38 H64 O16         | 212773-31-4 |        | HMDB33499 |              |
| LysoSM(d18:1)                                         | Phosphosphingolipids             | 1.771  | C23 H50 N2 O5 P     | 1670-26-4   | C03640 | HMDB06482 |              |
| Methyl (9Z)-8'-oxo-6,8'-diapo-6-carotenoate           | Diterpenoids                     | 2.717  | C23 H28 O3          | 101034-51-9 |        | HMDB31979 |              |
| MGDG(38:9)                                            | Glycosyldiradylglycerols         | 9.796  | C47 H72 O10         |             | C03692 |           | LMGL05010016 |
| N-Desethylamiodarone                                  | Metabolite of amiodarone         | 9.749  | C23 H25 I2 N O3     | 96027-74-6  |        |           |              |
| Nicotinic acid adenine dinucleotide phosphate (NAADP) | Nucleotides                      | 2.193  | C21 H28 N6 O18 P3   | 5502-96-5   | C13051 | HMDB01179 |              |
| N-Methylanthraniloyl-CoA                              | Microbials                       | 1.732  | C29 H43 N8 O17 P3 S |             | C12092 |           |              |
| N-Oleoylethanolamine                                  | Amines                           | 1.894  | C20 H39 N O2        | 111-58-0    |        | HMDB02088 |              |
| Nonadeca-10(Z)-enoic acid                             | Fatty acids                      | 5.848  | C19 H36 O2          | 67228-95-9  | C00174 | HMDB13622 |              |
| PA(32:0)                                              | Glycerophosphates                | 2.212  | C35 H69 O8 P        |             | C00416 |           | LMGP10010889 |
| PC(39:6)                                              | Glycerophosphocholines           | 5.462  | C47 H83 N O8 P      |             |        |           | LMGP01011579 |
| PC(21:1)                                              | Glycerophosphocholines           | 8.906  | C29 H57 N O8 P      |             |        |           | LMGP01010830 |
| PC(40:9)                                              | Glycerophosphocholines           | 1.841  | C48 H78 N O8 P      |             | C00157 | HMDB08732 |              |
| PC(P-42:1)                                            | Glycerophosphocholines           | 2.193  | C50 H98 N O7 P      |             |        | HMDB11329 |              |
| PE(37:1)                                              | Glycerophosphoethanolamines      | 3.319  | C42 H82 N O8 P      |             | C00350 | HMDB09516 |              |
| PE(P-40:6)                                            | Glycerophosphoethanolamines      | 4.459  | C45 H78 N O7 P      |             | C00350 | HMDB09677 |              |
| PE(P-42:1)                                            | Glycerophosphoethanolamines      | 3.380  | C47 H92 N O7 P      |             | C00350 | HMDB09775 |              |
| PE(O-20:0)                                            | Glycerophosphoethanolamines      | 9.682  | C25 H54 N O6 P      |             | C04476 |           | LMGP02060005 |
| PE(P-29:0)                                            | Glycerophosphoethanolamines      | 2.196  | C34 H68 N O7 P      |             |        |           | LMGP02030008 |
| Pelargonidin 3,5-di-(6-acetylglucoside)               | Flavonoids                       | 1.873  | C31 H35 O17         |             |        |           | LMPK12010045 |
| Perindoprilat                                         | ACE inhibitor                    | 0.644  | C17 H28 N2 O5       |             |        | HMDB60574 |              |
| PG(34:0)                                              | Glycerophosphoglycerols          | 2.932  | C40 H79 O10 P       |             |        | HMDB10572 |              |
| PG(30:4)                                              | Glycerophosphoglycerols          | 9.721  | C36 H63 O10 P       |             |        |           | LMGP04010425 |
| PGP(36:2)                                             | Glycerophosphoglycerols          | 1.965  | C42 H80 O13 P2      |             |        | HMDB13549 |              |
| PGPC                                                  | Glycerophosphocholines           | 9.665  | C29 H56 N O10 P     | 89947-79-5  |        |           |              |
| p-Hydroxyfosinoprilat                                 | ACE inhibitor                    | 0.446  | C27 H42 N O7 P      | 113411-10-2 |        |           |              |
| p-Hydroxyphenylbutazone glucuronide                   | NSAID                            | 1.284  | C25 H28 N2 O9       | 57817-94-4  |        |           |              |
| PI(44:10)                                             | Glycerophosphoinositols          | 2.201  | C53 H83 O13 P       |             |        |           | LMGP06010952 |
| PI(O-42:6)                                            | Glycerophosphoinositols          | 2.205  | C51 H89 O12 P       |             | C01194 |           | LMGP06020001 |
| p-Menthan-3-ol                                        | Monoterpenoids                   | 1.530  | C10 H20 O           | 1490-04-6   |        | HMDB35765 |              |
| Pro Asp Lys                                           | Tripeptides                      | 0.428  | C15 H26 N4 O6       |             |        |           |              |

|                          |                       |       |                |            |        |           |              |
|--------------------------|-----------------------|-------|----------------|------------|--------|-----------|--------------|
| PS(22:4)                 | Glycerophosphoserines | 3.215 | C28 H48 N O9 P |            |        |           | LMGP03050014 |
| PS(O-38:0)               | Glycerophosphoserines | 3.298 | C44 H88 N O9 P |            |        |           | LMGP03020051 |
| Pyridoxal                | Pyridines             | 9.329 | C8 H9 N O3     | 66-72-8    | C00250 | HMDB01545 |              |
| Sapiol                   | Fatty alcohols        | 5.601 | C34 H70 O      | 28484-70-0 |        | HMDB33177 |              |
| Sarsaparilloside         | Steroidal glycosides  | 2.196 | C57 H96 O28    | 24333-07-1 | C08911 | HMDB30118 |              |
| Senegin II               | Triterpenoids         | 2.165 | C70 H104 O32   | 34366-31-9 | C08978 |           |              |
| Stearoylethanolamide     | Amines                | 1.445 | C20 H41 N O2   | 111-57-9   |        | HMDB13078 |              |
| Tetrahydrofolyl-[Glu](n) | Pterins               | 1.248 | C24 H30 N8 O9  |            | C03541 | HMDB06826 |              |
| TG(56:1)                 | Triacylglycerols      | 1.757 | C59 H112 O6    |            |        | HMDB42367 |              |
| TG(61:14)                | Triacylglycerols      | 1.847 | C64 H96 O6     |            |        |           | LMGL03012328 |
| TG(o-58:6)               | Triacylglycerols      | 2.197 | C61 H108 O5    |            | C00422 | HMDB51102 |              |
| Torvoside E              | Steroidal glycosides  | 1.952 | C40 H66 O14    |            |        | HMDB41530 |              |
| Tyr Lys Tyr              | Tripeptides           | 0.698 | C24 H32 N4 O6  |            |        |           |              |
