# Supplementary material for: Impact of Blood Collection Tubes and Sample Handling Time on Serum and Plasma Metabolome and Lipidome
Source: MDPI journal article supplement (doi:10.3390/metabo8040088), 2018-12-04

**Supplemental Document S5. Quality control analysis.** Samples were pooled using the biological sample aliquots from P100, EDTA, and SST. These pooled human plasma samples were injected after every five samples and monitored for retention time and peak area reproducibility using spiked standards and endogenous compounds.

**(A)** CVs for spiked internal standards and randomly selected endogenous compounds.

| Fraction    | Compound Type     | Compound Name            | % CV RT | % CV Area |
|-------------|-------------------|--------------------------|---------|-----------|
| Hydrophobic | Internal Standard | Testosterone-d2          | 0.24    | 6.02      |
| Hydrophobic | Internal Standard | Cis-10-nonadecenoic acid | 0.34    | 3.62      |
| Hydrophobic | Internal Standard | Ceramide (d18:1/17:0)    | 0.33    | 5.23      |
| Hydrophobic | Endogenous        | 5-beta-Androsterone      | 0.24    | 6.18      |
| Hydrophobic | Endogenous        | LysoPE (16:0)            | 0.23    | 5.27      |
| Hydrophobic | Endogenous        | LysoPC (14:0)            | 0.21    | 4.82      |
| Hydrophobic | Endogenous        | PC (34:2)                | 0.24    | 4.69      |
| Hydrophobic | Endogenous        | PC (36:4)                | 0.22    | 4.12      |
| Hydrophilic | Internal Standard | Creatinine-d3            | 0.81    | 5.97      |
| Hydrophilic | Endogenous        | Gamma-Butyrolactone      | 0.28    | 6.95      |
| Hydrophilic | Endogenous        | Creatinine               | 0.67    | 8.93      |
| Hydrophilic | Endogenous        | 5-Aminopentanoic acid    | 0.23    | 8.89      |
| Hydrophilic | Endogenous        | Valine                   | 0.23    | 8.66      |
| Hydrophilic | Endogenous        | Leucine                  | 0.25    | 7.26      |
| Hydrophilic | Endogenous        | 3-Pyridylacetic acid     | 0.44    | 8.21      |
| Hydrophilic | Endogenous        | 1-Methylnicotinamide     | 0.82    | 9.77      |

**(B)** Variation of QCs compared to samples. PCA showing clustering of the QCs compared to the biological samples.

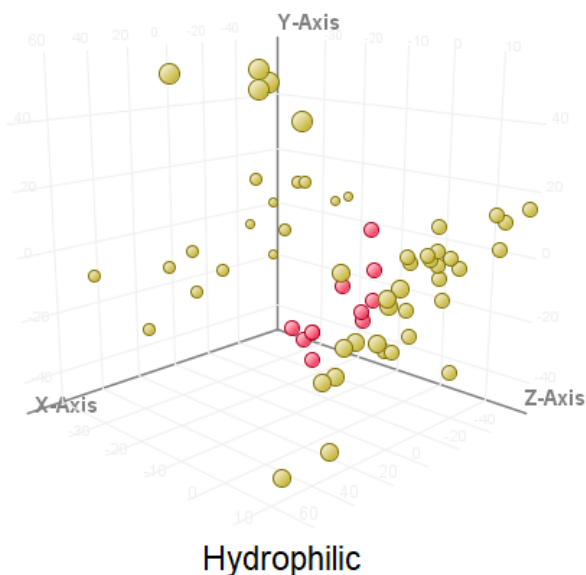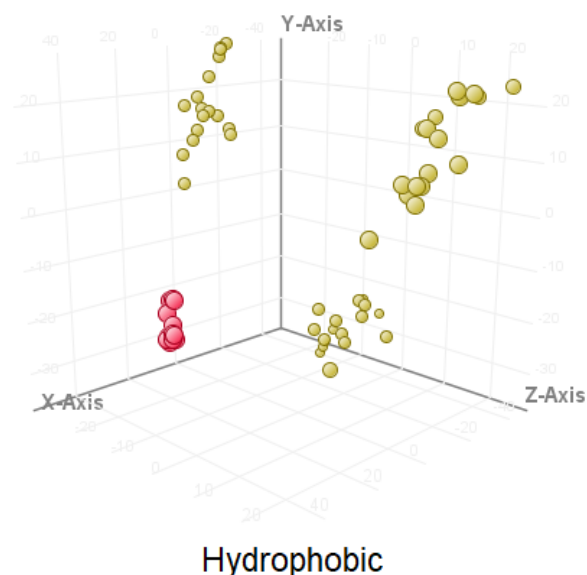

Supplement: s1 [file s1]
