# Supplementary material for: Impact of Blood Collection Tubes and Sample Handling Time on Serum and Plasma Metabolome and Lipidome
Source: MDPI journal article supplement (doi:10.3390/metabo8040088), 2018-12-04
Supplement: s1 [file s1]

**Supplemental Document S2. Present in P100 and SST but absent in EDTA.** Some of the common compounds to P100 and SST from Figure 1 C and D and that were database annotated are listed alphabetically.

| Compound Name                                                 | Compound Info.                                           | RT (mins) | Formula              | CAS         | KEGG   | HMDB      | Lipid Maps   | Fraction |
|---------------------------------------------------------------|----------------------------------------------------------|-----------|----------------------|-------------|--------|-----------|--------------|----------|
| 1-Hexadecanol                                                 | Fatty alcohol                                            | 3.588     | C16 H34 O            | 36653-82-4  | C00823 | HMDB03424 | --           | Lipid    |
| 2-Methyl-(Z)-7-octadecene                                     | Fatty acyl                                               | 1.768     | C19 H38              | --          | --     | --        | LMFA11000339 | Lipid    |
| 3-[(2,6-Dichlorobenzylidene)amino]-6H-dibenzo[b,d]pyran-6-one | Coumarin                                                 | 1.712     | C20 H11 Cl2 N O2     | --          | C14949 | --        | --           | Lipid    |
| 8-Iodocatechin Tetramethyl Ether                              | Flavonoid                                                | 0.409     | C19 H21 I O6         | --          | --     | --        | --           | Lipid    |
| Agavoside A                                                   | Sterol lipid /<br>Phytochemical                          | 2.321     | C33 H52 O9           | 56857-65-9  | C08885 | HMDB34391 | --           | Lipid    |
| Ajoene                                                        | Organosulfur<br>compound found in<br>garlic              | 0.401     | C9 H14 O S3          | --          | C16757 | --        | --           | Lipid    |
| Alpha-CEHC                                                    | Vitamin E antioxidant                                    | 1.387     | C16 H22 O4           | 4072-32-6   | --     | HMDB01518 | --           | Aqueous  |
| erythro-7,9-Hexatriacontanediol                               | Fatty acyl found in fats,<br>oils, herbs, spices         | 1.470     | C36 H74 O2           | 193419-75-9 | --     | HMDB31284 | --           | Lipid    |
| GlcCer(d18:0/14:0)                                            | Sphingolipid                                             | 6.639     | C38 H75 N O8         | --          | C01190 | --        | --           | Lipid    |
| Glycerol triundecanoate                                       | Triacylglycerol                                          | 7.126     | C36 H68 O6           | 13552-80-2  | --     | HMDB31089 | --           | Lipid    |
| Megalomicin C2                                                | Polyketide / Antibiotic                                  | 1.409     | C49 H86 N2 O17       | --          | C11988 | --        | LMPK04000029 | Lipid    |
| Micrococcin                                                   | Macrocyclic peptide<br>antibiotic                        | 1.812     | C48 H49 N13 O9 S6    | 67401-56-3  | C12051 | --        | --           | Aqueous  |
| Neuromedin B (1-3)                                            | Peptide found in human<br>CNS and GI tract               | 0.861     | C12 H22 N4 O5        | --          | --     | HMDB13016 | --           | Lipid    |
| N-Undecanoylglycine                                           | Glycine derivative and<br>minor fatty acid<br>metabolite | 10.019    | C13 H25 N O3         | --          | --     | HMDB13286 | --           | Aqueous  |
| Octadecanol                                                   | Fatty alcohol                                            | 4.446     | C18 H38 O            | 112-92-5    | D01924 | HMDB02350 | --           | Lipid    |
| PE(38:5)                                                      | Glycerophospholipid                                      | 5.644     | C43 H76 N O8 P       | --          | C00350 | HMDB09261 | --           | Aqueous  |
| PE(39:1)                                                      | Glycerophospholipid                                      | 9.266     | C44 H86 N O8 P       | --          | C00350 | HMDB09747 | --           | Aqueous  |
| Phosalone                                                     | Insecticide and<br>acaricide                             | 0.354     | C12 H15 Cl N O4 P S2 | --          | C11028 | --        | --           | Lipid    |
| Rizatriptan                                                   | Migraine drug                                            | 9.628     | C15 H19 N5           | 145202-66-0 | --     | --        | --           | Aqueous  |
| Theasapogenol A                                               | Prenol lipid found in<br>tea                             | 1.441     | C30 H50 O6           | 13844-22-9  | --     | HMDB34519 | --           | Aqueous  |
| Torvoside G                                                   | Steroidal glycoside<br>found in fruits                   | 4.078     | C34 H56 O9           | 184777-22-8 | --     | HMDB30337 | --           | Aqueous  |
